# Supplementary material for: From waste to food: Optimising the breakdown of oil palm waste to provide substrate for insects farmed as animal feed
Source: PubMed Central journal article supplement (PMC6837394; doi:10.1371/journal.pone.0224771), 2019-11-07
Supplement: pone.0224771.s020.pdf [file pone.0224771.s020.pdf]

| Data Set                            | Before batch correction | After batch correction |
|-------------------------------------|-------------------------|------------------------|
| Pre-processed EFB<br>negative mode* | 2.604                   | 0.356                  |
| Pre-processed EFB<br>positive mode  | 4.059                   | 0.455                  |
| Digested EFB<br>negative mode       | 0.950                   | 0.135                  |
| Digested EFB<br>positive mode       | 2.111                   | 0.083                  |
