# Supplementary material for: From waste to food: Optimising the breakdown of oil palm waste to provide substrate for insects farmed as animal feed
Source: PubMed Central journal article supplement (PMC6837394; doi:10.1371/journal.pone.0224771), 2019-11-07
Supplement: pone.0224771.s021.pdf [file pone.0224771.s021.pdf]

| Run    | Sample type         | BMP Volatile Solids Ratio (Digestate VS: EFB VS) | pH | Feedstock added (g) | 5M acetic acid added (ml) |
|--------|---------------------|--------------------------------------------------|----|---------------------|---------------------------|
| 1      | Microwave EFB       | 2:1                                              | 7  | 64.35               | -                         |
| 1      | Pressure cooked EFB | 2:1                                              | 7  | 7.69                | -                         |
| 1<br>3 | Steamed EFB         | 2:1                                              | 7  | 8.13<br>5.66        | -                         |
| 1      | Microwave EFB       | 2:1                                              | 6  | 64.35               | 4.2                       |
| 1      | Pressure cooked EFB | 2:1                                              | 6  | 7.69                | 5                         |
| 1      | Steamed EFB         | 2:1                                              | 6  | 8.13                | 5.1                       |
| 1      | Microwave EFB       | 1:2                                              | 7  | 257.4               | -                         |
| 1<br>3 | Steamed EFB         | 1:2                                              | 7  | 32.51<br>22.64      | -                         |
| 3      | EFB                 | 1:2                                              | 7  | 12.59               | -                         |
| 2      | Composted EFB       | 2:1                                              | 7  | 5.18                | -                         |
| 2      | Ionic liquid EFB    | 2:1                                              | 7  | 28.89               | -                         |
| 2<br>3 | EFB                 | 2:1                                              | 7  | 3.15<br>3.15        | -                         |
| 2<br>3 | Milled EFB          | 2:1                                              | 7  | 2.98<br>3.03        | -                         |
| 2      | Composted EFB       | 2:1                                              | 6  | 5.18                | 4                         |
| 2      | Ionic liquid EFB    | 2:1                                              | 6  | 28.89               | 4                         |
| 2      | Untreated EFB       | 2:1                                              | 6  | 3.15                | 4                         |
| 2<br>3 | Digestate only      | -                                                | 7  | -                   | -                         |
