# Supplementary material for: From waste to food: Optimising the breakdown of oil palm waste to provide substrate for insects farmed as animal feed
Source: PubMed Central journal article supplement (PMC6837394; doi:10.1371/journal.pone.0224771), 2019-11-07
Supplement: pone.0224771.s022.pdf [file pone.0224771.s022.pdf]

| Pre-processing method   | VFA (gL <sup>-1</sup> ) |
|-------------------------|-------------------------|
| Microwaved 2:1          | 1.20                    |
| Pressure cooked 2:1     | 2.20                    |
| Steamed 2:1             | 2.10                    |
| Microwaved 2:1 pH6      | 10.55                   |
| Pressure cooked 2:1 pH6 | 20.21                   |
| Steamed 2:1 pH6         | 30.67                   |
| Microwaved 1:2          | 3.67                    |
| Steamed 1:2             | 4.78                    |
| Composted 2:1           | 2.95                    |
| Ionic Liquid 2:1        | 1.00                    |
| Untreated EFB 2:1       | 3.75                    |
| Milled 2:1              | 0.95                    |
| Composted 2:1 pH6       | 10.82                   |
| Ionic Liquid 2:1 pH6    | 6.97                    |
| Untreated EFB 2:1 pH6   | 8.62                    |
| Digestate only          | 1.26                    |
